# Supplementary material
Source: PubMed Central journal article supplement (PMC9423686)
Supplement: NIHMS1830166-supplement-1.pdf [file NIHMS1830166-supplement-1.pdf]

## SUPPLEMENTARY MATERIAL

Transcriptome sequencing of 3,3',4,4',5-Pentachlorobiphenyl (PCB126)-treated human preadipocytes demonstrates progressive changes in pathways associated with inflammation and diabetes.

Francoise A. Gourronc, Brynn K. Helm, Larry W. Robertson, Michael S. Chimenti, Hans Joachim-Lehmler, James A. Ankrum, Aloysius J. Klingelhutz

Content:

Table S1

Table S2

Figure S1

Figure S2

Table S1: Chemical signature pathways (top 10) of PCB126-treated preadipocytes after 9 hours.

| <b>Chemical Id</b> | <b>Chemical Name</b>                     | <b>pv_p_fdr</b> | <b>zscore</b> |
|--------------------|------------------------------------------|-----------------|---------------|
| D013749            | Tetrachlorodibenzodioxin                 | 4.96E-10        | 4.15862       |
| C023035            | 3,4,5,3',4'-pentachlorobiphenyl (PCB126) | 4.00E-13        | 3.53009       |
| C086401            | pentabromodiphenyl ether                 | 1.17E-06        | 4.351941      |
| D008748            | Methylcholanthrene                       | 2.55E-07        | 2.886751      |
| D000336            | Aerosols                                 | 1.79E-06        | 3.152963      |
| D001564            | Benzo(a)pyrene                           | 0.000206        | 4.004543      |
| C022838            | nickel chloride                          | 0.000179        | 3.577709      |
| D017632            | Asbestos, Serpentine                     | 2.51E-05        | 2.683282      |
| D009853            | Omeprazole                               | 1.96E-05        | 2.236068      |
| D004137            | Dinitrochlorobenzene                     | 0.00027         | 3.464102      |

Table S2: Pathways in common between different timepoints (9-hour, 1-day, 3-day) of PCB126 exposure of preadipocytes.  $P \leq 0.05$ ,  $Fdr \leq 0.05$ .

| Name of Pathway                                      | 9-Hour<br>pv_fdr | 1-Day<br>pv_fdr | 3-Day<br>pv_fdr |
|------------------------------------------------------|------------------|-----------------|-----------------|
| Cytokine-cytokine receptor interaction               | 0.000213         | 1.58E-06        | 3.69E-06        |
| MAPK signaling pathway                               | 0.000213         | 0.000499        | 1.10E-05        |
| Osteoclast differentiation                           | 0.002083         | 0.013481        | 7.33E-05        |
| Neuroactive ligand-receptor interaction              | 0.04661          | 0.000775        | 7.33E-05        |
| AGE-RAGE signaling pathway in diabetic complications | 0.00959          | 8.53E-05        | 0.000132        |
| Pathways in cancer                                   | 0.011362         | 0.000813        | 0.000177        |
| Ras signaling pathway                                | 0.037673         | 0.043676        | 0.000197        |
| Complement and coagulation cascades                  | 0.015962         | 0.049746        | 0.000197        |
| Rheumatoid arthritis                                 | 0.001351         | 0.000393        | 0.000214        |
| NF-kappa B signaling pathway                         | 0.017713         | 0.004984        | 0.000553        |
| Hematopoietic cell lineage                           | 0.043771         | 0.012131        | 0.000975        |
| Fluid shear stress and atherosclerosis               | 0.04661          | 0.010475        | 0.00362         |

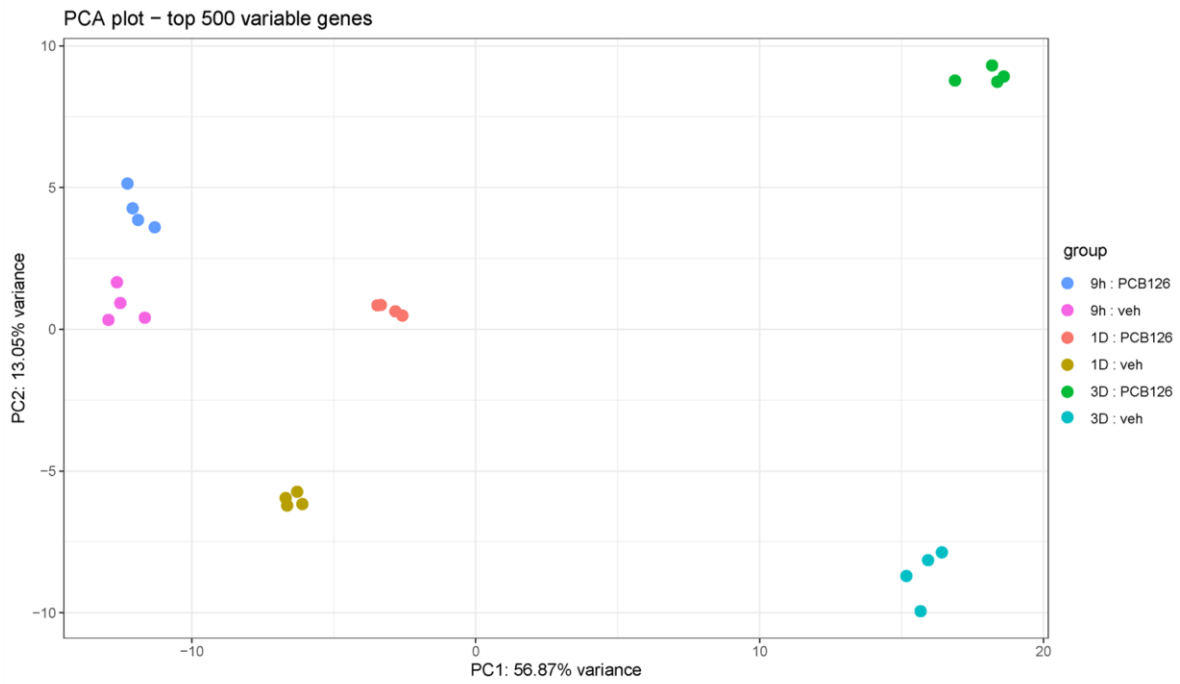

Figure S1: Principal Component Analysis of top 500 variable gene transcripts from replicates of vehicle and PCB126 treated preadipocytes over a time course of 9 hours (9h), 1 day (1D), and 3 days (3D).

9-Hour

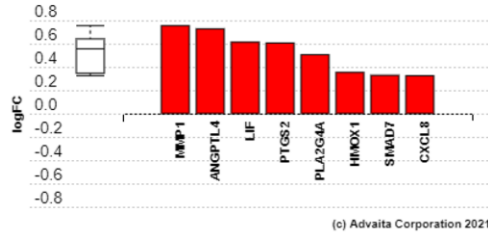

1-Day

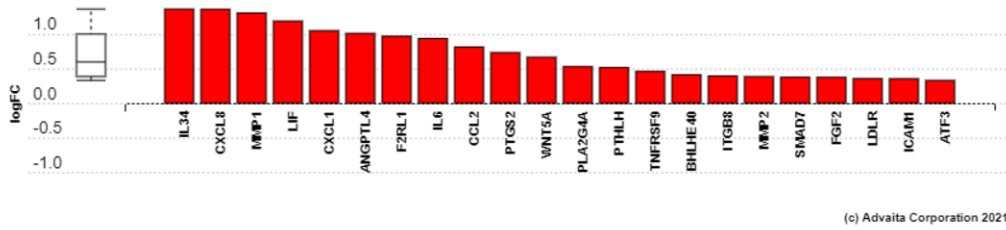

3-Day

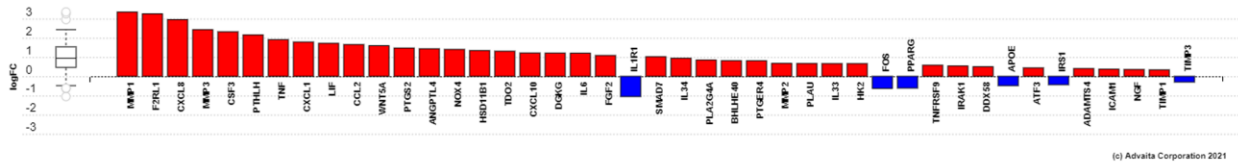

Figure S2: Transcript level changes (log2fold) of genes in the IL-1 $\beta$  pathway at different timepoints (9-hour, 1-day, 3-day) of PCB126-exposed preadipocytes compared to vehicle controls at the same timepoints. Fdr $\leq$ 0.05.
